# Supplementary material
Source: Research Square preprint supplement (doi:10.21203/rs.3.rs-8995396/v1)
Supplement: Supplementary file 1 [file 3f08e270ba8e0f0d9fd63786.pdf]

**Supplementary Table 1 (related to Fig.1 and Extended data Fig.1)**

| <b>Primers specific to rat Chr.X</b> |                                 |                      |                                 |
|--------------------------------------|---------------------------------|----------------------|---------------------------------|
| <b>primer</b>                        | <b>sequence (5'-3')</b>         | <b>primer</b>        | <b>sequence (5'-3')</b>         |
| rX1- <i>forward</i>                  | AGGATTTGTTGCTAGATGTCTGAG<br>GT  | rX1- <i>reverse</i>  | TTCATTAGCTGCATAACCCAAGTGTG      |
| rX2- <i>forward</i>                  | TACTGCTCTACGTGTTGAGGTAAG<br>AC  | rX2- <i>reverse</i>  | AAGTCATCACGCTTGTGCTCTTATTC      |
| rX3- <i>forward</i>                  | ATGCTCCATTGACAGAGTAGACAA<br>GT  | rX3- <i>reverse</i>  | AACGTGCCCTCATTAAACTTCAGAG<br>G  |
| rX4- <i>forward</i>                  | AGGGCTGTGGTGAAGACTAATGTA<br>AT  | rX4- <i>reverse</i>  | TACCTGGGAATGTGAAGGTCATGAT<br>T  |
| rX5- <i>forward</i>                  | AATGGAGAAGCTGGGAGCCCTTTAT<br>TA | rX5- <i>reverse</i>  | GATTACTTTCCCTACCTCCACACCAT      |
| rX6- <i>forward</i>                  | CAAACCTCAGAGAAGGGCCACATT<br>TAC | rX6- <i>reverse</i>  | TCATCCTGGTTCCTAATTGTCCTCTG      |
| rX7- <i>forward</i>                  | TGACCTAGAGGTCTACCTGTCTCA<br>AT  | rX7- <i>reverse</i>  | CTTGACGATCTCTGTGACTTTGGAC       |
| rX8- <i>forward</i>                  | ACCTACTGCCTATGTTGTGGTGTTA<br>T  | rX8- <i>reverse</i>  | ATGACTAATCGTAGCCTTGTGGAGTT      |
| rX9- <i>forward</i>                  | GGGCAAATACTGGCAATTCACAAA<br>AG  | rX9- <i>reverse</i>  | TTAATGGAATGTGAGCTGAGGCAAAA<br>G |
| rX10- <i>forward</i>                 | CGCACAGAAACAGGCACATATGTT<br>TA  | rX10- <i>reverse</i> | CCCATAGGCTCTCCTTATTTTCGGTTA     |
| rX11- <i>forward</i>                 | TTCCATTGGACTTGATTCTTGATGG<br>C  | rX11- <i>reverse</i> | GTAGTCGAAGGCATCCATATCTCCAT      |
| rX12- <i>forward</i>                 | AGAATTCAGTTGCCATGCTTACTG<br>TC  | rX12- <i>reverse</i> | TTGGGCCAGACTATGATTAGGAACA<br>A  |
| rX13- <i>forward</i>                 | GTAAGGAAATGGCTGTGCTTATCT<br>G   | rX13- <i>reverse</i> | ATGCAAGGGTATCTGTATTGCCCTAT      |
| rX14- <i>forward</i>                 | TCATGACTTCGTTTCATAACAGCCA<br>AC | rX14- <i>reverse</i> | TGACTACCATCTGGGAATACAAGCA<br>A  |
| rX15- <i>forward</i>                 | CCTGAAACTGACATGTAAGGAAC<br>GTC  | rX15- <i>reverse</i> | AGACGGGAAATTTCTCAGATACCAC<br>A  |
| rX16- <i>forward</i>                 | AGAGTTGCATGTTTTTCAACTGGT<br>CA  | rX16- <i>reverse</i> | ATCAAGCCTTTCCTCCTTTGATTTGG      |
| rX17- <i>forward</i>                 | ATAGCATGTTTGTGTCATCAGCGA<br>AA  | rX17- <i>reverse</i> | CATGTTTATTCCACTGGGGAAACCTC      |

**Supplementary Table 2 (related to Fig.1 and Extended data Fig.1)**

| <b>Primers specific to mouse Chr.X</b> |                                 |                     |                                 |
|----------------------------------------|---------------------------------|---------------------|---------------------------------|
| <b>primer</b>                          | <b>sequence (5'-3')</b>         | <b>primer</b>       | <b>sequence (5'-3')</b>         |
| mX1- <i>forward</i>                    | TGGGGTGTGCTTGCCATTCTTA<br>GTC   | mX1- <i>reverse</i> | AGAGGGGACAGAGAAAACAATGCA<br>TCC |
| mX2- <i>forward</i>                    | TTTCTTACTCGTTGGAGGCCATGT<br>CAG | mX2- <i>reverse</i> | GTCTTGGCTGTGCCATTGAATTGCT<br>G  |
| mX3- <i>forward</i>                    | AGCAAGGAACTACCCTAATCCCTG<br>ACA | mX3- <i>reverse</i> | TGCTTGTGTCCTCATTGCTACTGTTG<br>T |
| mX4- <i>forward</i>                    | ACATACTGTGGACCTGAAATGCAA<br>GAC | mX4- <i>reverse</i> | ACTTGGGGATGACTAGATGTGGTTT<br>CT |
| mX5- <i>forward</i>                    | CCAGACTTACCTGAATTGCATCAG<br>CCT | mX5- <i>reverse</i> | CCCAGGCAGACGGACATAATTTCTT<br>GA |
| mX6- <i>forward</i>                    | AGAAAGGAGAGGTTAAAGAGACT<br>GGG  | mX6- <i>reverse</i> | CTAAGGGTAGGGCATAGTGAGGAAT<br>G  |

**Supplementary Table 3 (related to Fig.1 and Extended data Fig.1)**

| <b>Primers specific to rat autosomes (rat Chr.1~20)</b> |                               |                            |                                 |
|---------------------------------------------------------|-------------------------------|----------------------------|---------------------------------|
| <b>primer</b>                                           | <b>sequence (5'-3')</b>       | <b>primer</b>              | <b>sequence (5'-3')</b>         |
| rChr.1-<br><i>forward</i>                               | ATGACCAGGAGCAGGTTACATTTACT    | rChr.1-<br><i>reverse</i>  | CCTCTAAAGCTACACAAAAGGCTGT<br>C  |
| rChr.2-<br><i>forward</i>                               | CCAAGGAGGCAAGCAATTCAGATAAA    | rChr.2-<br><i>reverse</i>  | CCACAGACTCCTTTTCATCCTTCTA       |
| rChr.3-<br><i>forward</i>                               | GTGTTGTTCCAGACACTGAGAAAGAG    | rChr.3-<br><i>reverse</i>  | TAATCGTCGTCGCCATTACAGCTAA       |
| rChr.4-<br><i>forward</i>                               | GTCCAAAAACAAAAGGGAACCAAA<br>C | rChr.4-<br><i>reverse</i>  | ACAATGTCACCAAACCTTGCTTGATC<br>T |
| rChr.5-<br><i>forward</i>                               | TCTCAGGTCACCTATAGGAAGTCAGT    | rChr.5-<br><i>reverse</i>  | TGTGATTCCACCCGGTTACTCTTATT      |
| rChr.6-<br><i>forward</i>                               | AATATTCTGTTGTGACTGTTTCGCAGG   | rChr.6-<br><i>reverse</i>  | TCTGGTTAGCTCTCTGTAAGGTGAA<br>C  |
| rChr.7-<br><i>forward</i>                               | ACAGATTGTGGCTCATGAAATGAGTG    | rChr.7-<br><i>reverse</i>  | CAAGGGCTTTGACTTGATCCTTCTG       |
| rChr.8-<br><i>forward</i>                               | CATAGACCCCTCCCTTAAGTTTGA      | rChr.8-<br><i>reverse</i>  | TCAGGATTAAGTATGTTTGCCAGGG<br>A  |
| rChr.9-<br><i>forward</i>                               | CAGGACTCGCAGAAATGGGATAATTC    | rChr.9-<br><i>reverse</i>  | CTGACAGCTTCCTTCATAAACCA<br>G    |
| rChr.10-<br><i>forward</i>                              | GGTTTCCACTAAGATGTCTGTACCCT    | rChr.10-<br><i>reverse</i> | TTCACCTGCATTACATTTAGAGCTG       |
| rChr.11-<br><i>forward</i>                              | TCTTCTGGGAAGCACTCATCACATA     | rChr.11-<br><i>reverse</i> | GAAGAGCATCAACTCCACTTTCTTC<br>C  |
| rChr.12-<br><i>forward</i>                              | CAGGCACATGTCTCAAACCTAAAGT     | rChr.12-<br><i>reverse</i> | GGAGGATTCTAAGCAAGTACACCAC<br>T  |
| rChr.13-<br><i>forward</i>                              | GCTCACTGAGTTCTAGAGAGGAGTTT    | rChr.13-<br><i>reverse</i> | GGATTAGAGAGGAGGGGTCAATTGT<br>T  |
| rChr.14-<br><i>forward</i>                              | GAAGAGTTTGTTCCTGTGGCTGTATC    | rChr.14-<br><i>reverse</i> | ACAGGAACTAGGGGAACTAATGTCA<br>C  |
| rChr.15-<br><i>forward</i>                              | TCTTCATCTCCTCTCCAGGACATTG     | rChr.15-<br><i>reverse</i> | CAACTACAGCTGCTATACTGAAGGG<br>A  |
| rChr.16-<br><i>forward</i>                              | TGAGAAAGAAAAGTCTTCACCTGGGA    | rChr.16-<br><i>reverse</i> | GGTGTAGGAAATGGCTCTGAAGACT<br>A  |
| rChr.17-<br><i>forward</i>                              | AAAATGTCCACTGTTCTGCATAGCTC    | rChr.17-<br><i>reverse</i> | GTTTACAAAAGCTTGCAATTACCGG<br>G  |
| rChr.18-<br><i>forward</i>                              | ATGTGTATCACAAAGGACCATGAGGA    | rChr.18-<br><i>reverse</i> | CTACCTTCAAGGCCATTCAAATG<br>T    |
| rChr.19-<br><i>forward</i>                              | AGGGTACATCTTTACCCTGACTTTC     | rChr.19-<br><i>reverse</i> | AATCACTGCTCCTGGTAATCGTTTTG      |
| rChr.20-<br><i>forward</i>                              | AGGACTTCCCTAAGCAGTCTCAATTC    | rChr.20-<br><i>reverse</i> | CAGGAATCGTAGCAATTTGCAAACA<br>C  |

**Supplementary Table 4 (related to Fig.1, Fig.5, and Extended data Fig.6)**

| <b>SgRNAs used for CRISPR/Cas9 mediated targeting</b> |                         |                                |            |
|-------------------------------------------------------|-------------------------|--------------------------------|------------|
| <b>aim</b>                                            | <b>sgRNA</b>            | <b>spacer sequence (5'-3')</b> | <b>PAM</b> |
| Label rat X chromosome                                | Rat chr.X sgRNA 1       | TGTTGCGGGGTTTTATGG             | CGG        |
|                                                       | Rat chr.X sgRNA 2       | GCAACAACCTATCCAATGTA           | GGG        |
| Label mouse X chromosome                              | Mouse <i>Hprt</i> sgRNA | AACAAATCTAGGTCATAACC           | TGG        |
| Knockout <i>Rhox5</i> gene on rat X chromosome        | Rat rhox5 sgRNA-1       | TTTCAGGATATGGAGGCTCA           | AGG        |
|                                                       | Rat rhox5 sgRNA-2       | GAGCGCATTTTGCTAAGCAG           | TGG        |
|                                                       | Rat rhox5 sgRNA-3       | CAAATTACCTACCTGCACTC           | TGG        |

**Supplementary Table 5 (related to Fig.5 and Extended data Fig.6)**

| <b>Quantitative real-time PCR primers</b> |                             |                                   |                                |
|-------------------------------------------|-----------------------------|-----------------------------------|--------------------------------|
| <b>primer</b>                             | <b>sequence (5'-3')</b>     | <b>primer</b>                     | <b>sequence (5'-3')</b>        |
| <i>Gapdh</i> -<br><i>forward</i>          | AGGTCGGTGTGAACGGATTTG       | <i>Gapdh</i> -<br><i>reverse</i>  | TGTAGACCATGTAGTTGAGGTCA        |
| <i>Nanog</i> -<br><i>forward</i>          | AGGATGAAGTGCAAGCGGTG        | <i>Nanog</i> -<br><i>reverse</i>  | TGCTGAGCCCTTCTGAATCAG          |
| <i>Oct4</i> -<br><i>forward</i>           | GCAGATCACTCACATCGCCAAT      | <i>Oct4</i> -<br><i>reverse</i>   | CCTGGGAAAGGTGTCCCTGTAG         |
| <i>Nestin</i> -<br><i>forward</i>         | CCCTGAAGTCGAGGAGCTG         | <i>Nestin</i> -<br><i>reverse</i> | CTGCTGCACCTCTAAGCGA            |
| <i>T</i> -<br><i>forward</i>              | ATGTTCTACAGCCTCTTGTGGATACC  | <i>T</i> -<br><i>reverse</i>      | TAGCAAAGGACTCTGATTAAGTCC       |
| <i>Ext1</i> -<br><i>forward</i>           | GGACACTGTGCTTCAACTACGG      | <i>Ext1</i> -<br><i>reverse</i>   | ACCGCTCCTTTGAGTTATCCAG         |
| <i>Rex1</i> -<br><i>forward</i>           | GAAGAGAGAGGTCACGCAAGAGACG   | <i>Rex1</i> -<br><i>reverse</i>   | TCGATAAGACACCACAGTACACACC<br>G |
| <i>Esrrb</i> -<br><i>forward</i>          | CTGCAGCTGGTGCAGGTA          | <i>Esrrb</i> -<br><i>reverse</i>  | CCTGGAGCTTCTGCACCGCC           |
| <i>Prdm14</i> -<br><i>forward</i>         | GCATCCTGGTCCACAGAG          | <i>Prdm14</i> -<br><i>reverse</i> | CTGCAGAACACGCCAAAGTG           |
| <i>mTcl1</i> -<br><i>forward</i>          | TCTGGCCAGGCCAGATCA          | <i>mTcl1</i> -<br><i>reverse</i>  | GTGAGGCCATAGGCCAGGT            |
| <i>Laptm5</i> -<br><i>forward</i>         | CCAGCACCTGGAGGCTGGGA        | <i>Laptm5</i> -<br><i>reverse</i> | ACCTCACCACTGTGTGGCCCT          |
| <i>Rhox5</i> -<br><i>forward</i>          | GAGTCAAGGAAGACTCGGAAGAACAGC | <i>Rhox5</i> -<br><i>reverse</i>  | TTCTTCTCCTTCGCCTTCTGTTCCC      |
